# Supplementary material for: Identifying Therapeutic Agents for Amelioration of Mitochondrial Clearance Disorder in Neurons of Familial Parkinson Disease
Source: PubMed Central journal article supplement (PMC7355139; doi:10.1016/j.stemcr.2020.04.011), 2020-05-28
Supplement: mmc1.pdf [file mmc1.pdf]

**Stem Cell Reports, Volume 14**

**Supplemental Information**

**Identifying Therapeutic Agents for Amelioration of Mitochondrial Clearance Disorder in Neurons of Familial Parkinson Disease**

**Akihiro Yamaguchi, Kei-ichi Ishikawa, Tsuyoshi Inoshita, Kahori Shiba-Fukushima, Shinji Saiki, Taku Hatano, Akio Mori, Yutaka Oji, Ayami Okuzumi, Yuanzhe Li, Manabu Funayama, Yuzuru Imai, Nobutaka Hattori, and Wado Akamatsu**

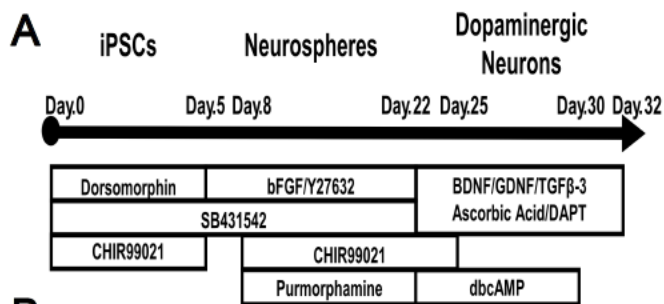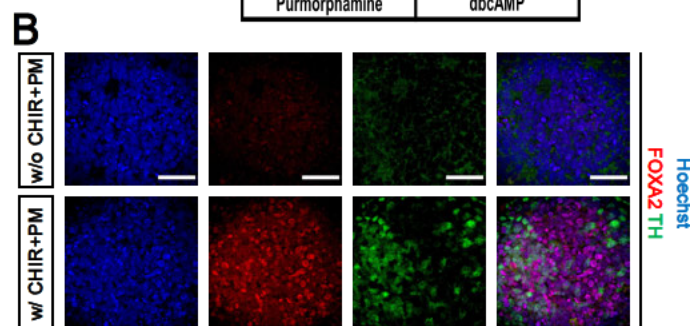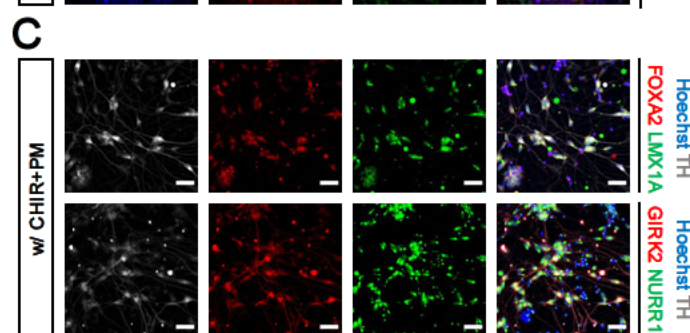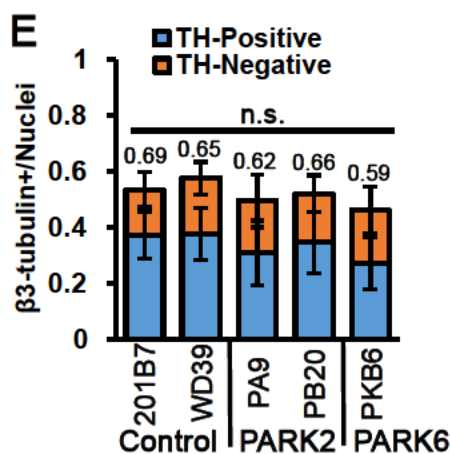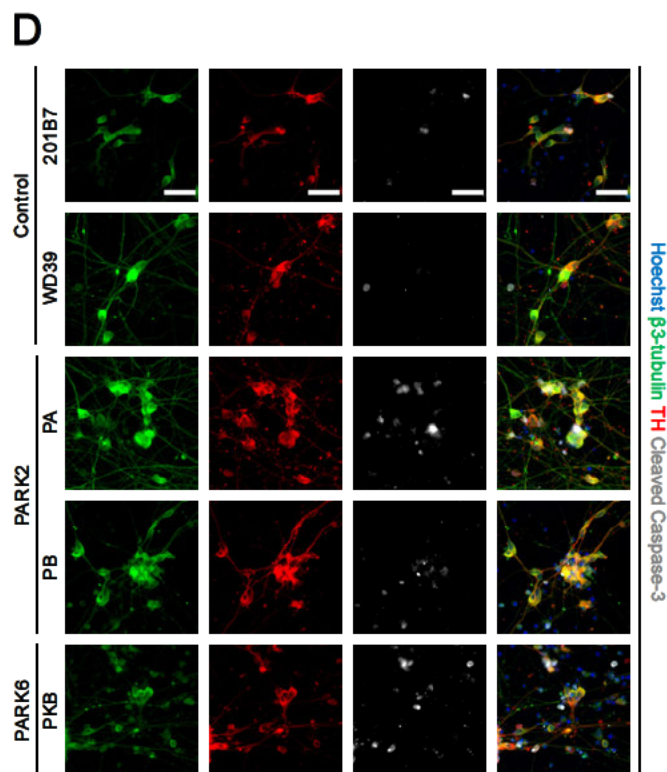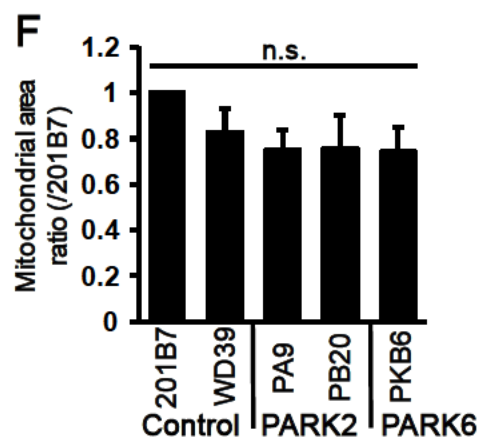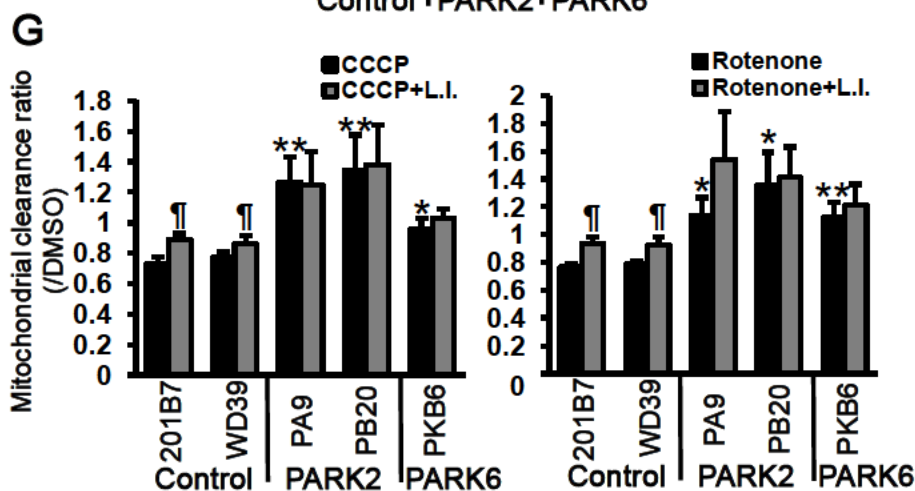

Figure S1

**Figure S1. Overview and Characterization of PARK2/6 Dopaminergic Neurons. Related to Figure 1**

(A) Schematic of the iPSC induction into midbrain dopaminergic neurons. (B) Characterization of neurosphere treated without (w/o) or with (w/) CHIR 99021 (CHIR) and Purmorphamine (PM) from 201B7. Immunocytochemical staining was performed with antibodies against a dopaminergic neuron marker (TH) and a midbrain marker (FOXA2). Scale bar = 50  $\mu$ m. (C) Characterization of differentiated neuron treated with CHIR and PM from 201B7. Immunocytochemical staining was performed with antibodies against a dopaminergic neuron marker (TH) and midbrain markers (FOXA2, LMX1A, GIRK2, and NURR1). Scale bar = 50  $\mu$ m. (D) Representative images of iPSC-derived dopaminergic neurons. Scale bar = 50  $\mu$ m. (E) Quantitative analysis of  $\beta$ 3-tubulin positive ratio. The percentage above the bar indicates TH-positive ratio in  $\beta$ 3-tubulin-positive neurons (n=4 independent replicates; mean  $\pm$  SEM). n.s. means not significant by one-way ANOVA. (F) Quantitative data of basal mitochondrial area, representing the ratio of mitochondrial area of neurons as standardized by 201B7 (n=7-9 independent replicates; mean  $\pm$  SEM). n.s. means not significant by one-way ANOVA. (G) Validation of the mitochondrial uncoupler and lysosome inhibitor for mitochondrial clearance assay. Data represent the ratio of mitochondrial area of neurons treated with CCCP or rotenone with/without lysosomal inhibitors (L.I.; E64d and pepstatin A; n=9 independent replicates; mean  $\pm$  SEM). \*p<0.05; \*p<0.01 compared with 201B7, †p<0.05 comparing CCCP treatment with CCCP+L.I. treatment by Wilcoxon rank-sum test. (H) Quantitative data of spontaneous apoptosis, representing the ratio of the intensity of cleaved caspase-3 in neurons and that of control (201B7) neurons (n=4-5 independent replicates; mean  $\pm$  SEM). \*p<0.05 compared with control (201B7) by Wilcoxon rank-sum test. CCCP means carbonyl cyanide 3-chlorophenylhydrazone.

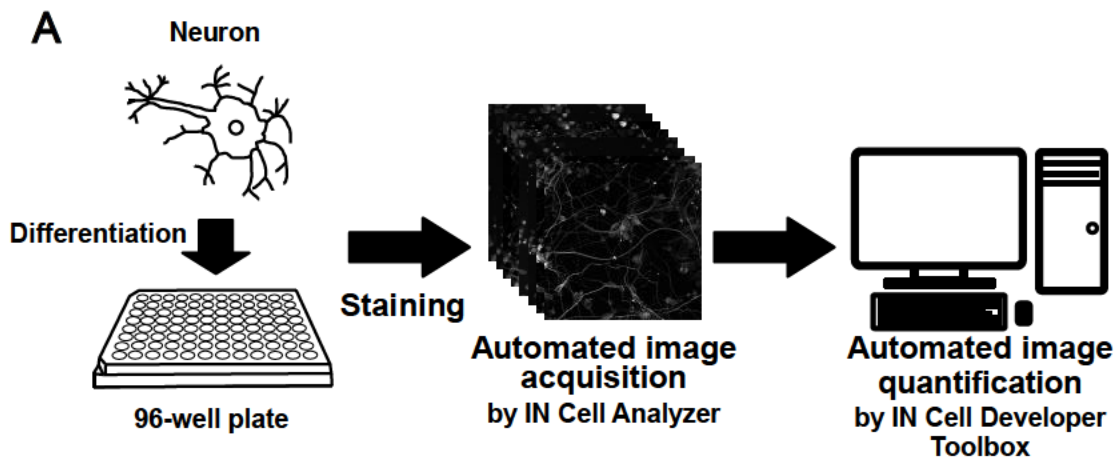

**B**

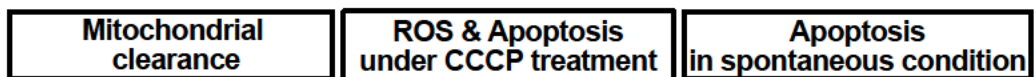

1. Recognize nuclei

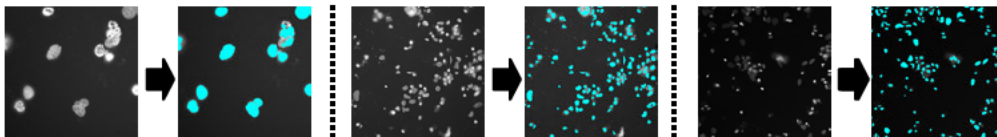

2. Determine the neuronal soma based on nuclei and  $\beta$ 3-tubulin

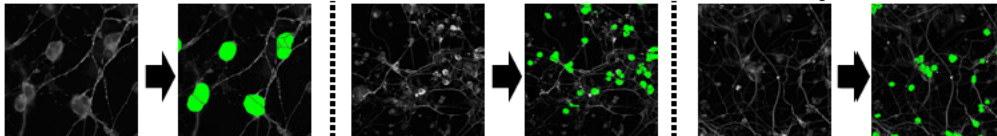

3. Recognize the fluorescent of each indicators

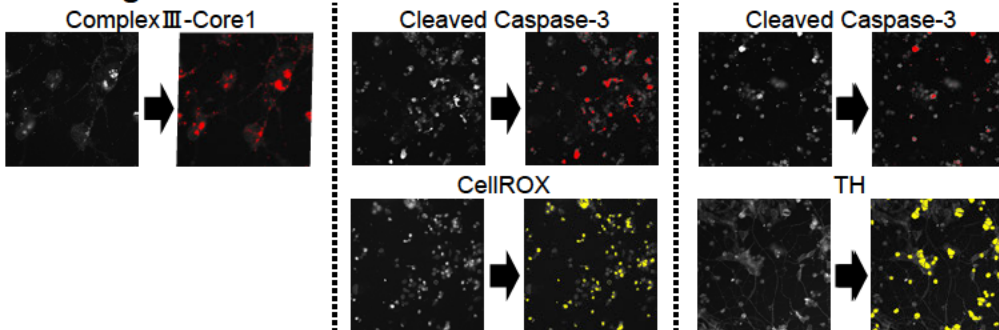

4. Automated quantification of area/intensity/count of the indicators in neuronal soma

5. Standardize by the number of neuronal cell and perform tactical analysis

**Figure S2. Schematic Representation of the Proposed Semi-Automated High-Throughput Phenotype Detection System. Related to Figure 2.**

(A) Dopaminergic neurons were differentiated on 96-well plates and stained. All images were obtained automatically using the imaging cytometer and analyzed. (B) Recognition of cell features (e.g. nuclei, neural cell soma, mitochondria) and subsequent quantification of the mitochondrial area, CellROX<sup>®</sup> intensity, and cleaved caspase-3 intensity in the overlapped area were automatically analyzed. Results were standardized using the neuronal nuclei number in the field.

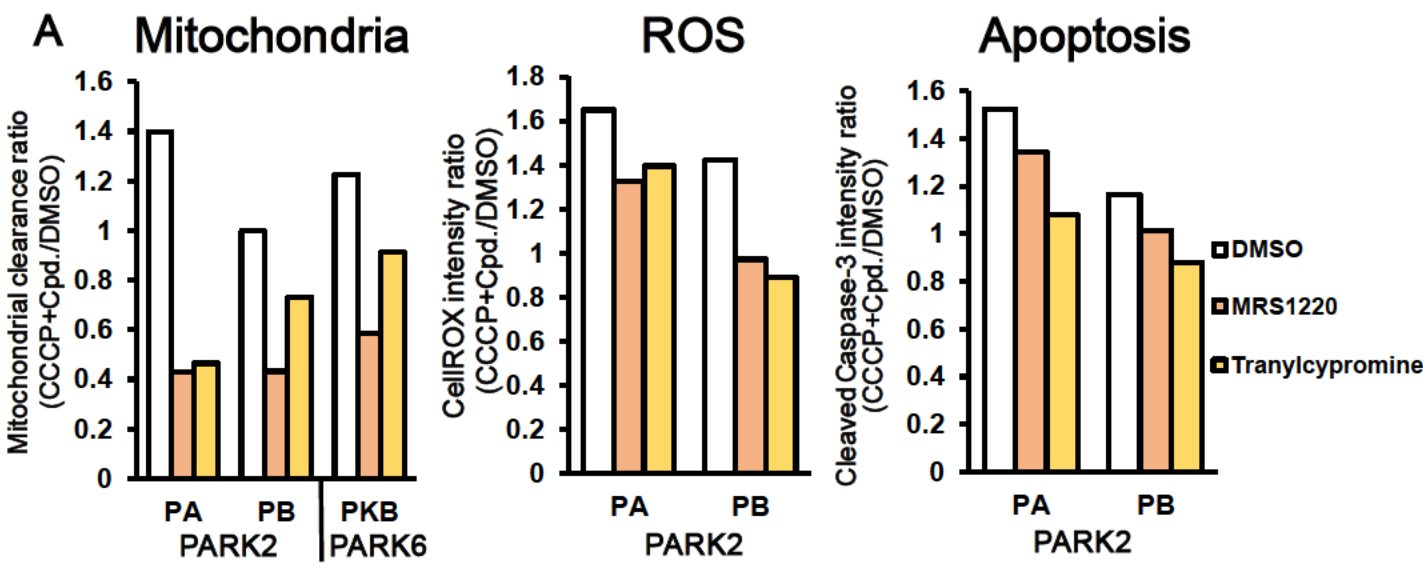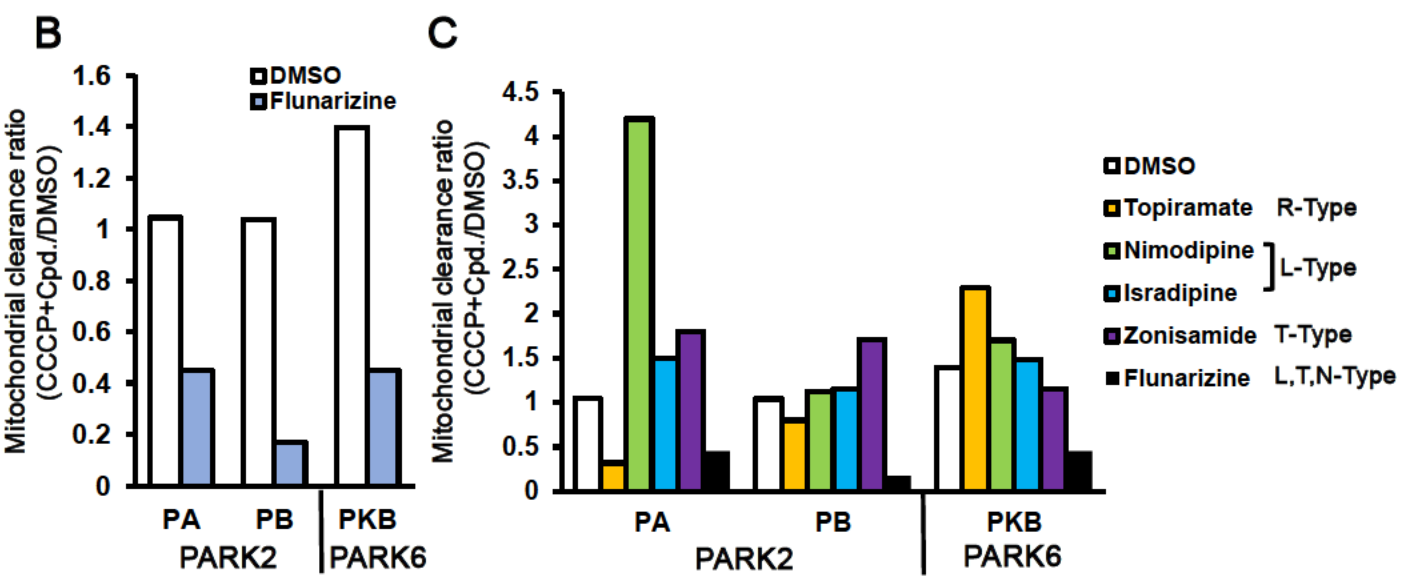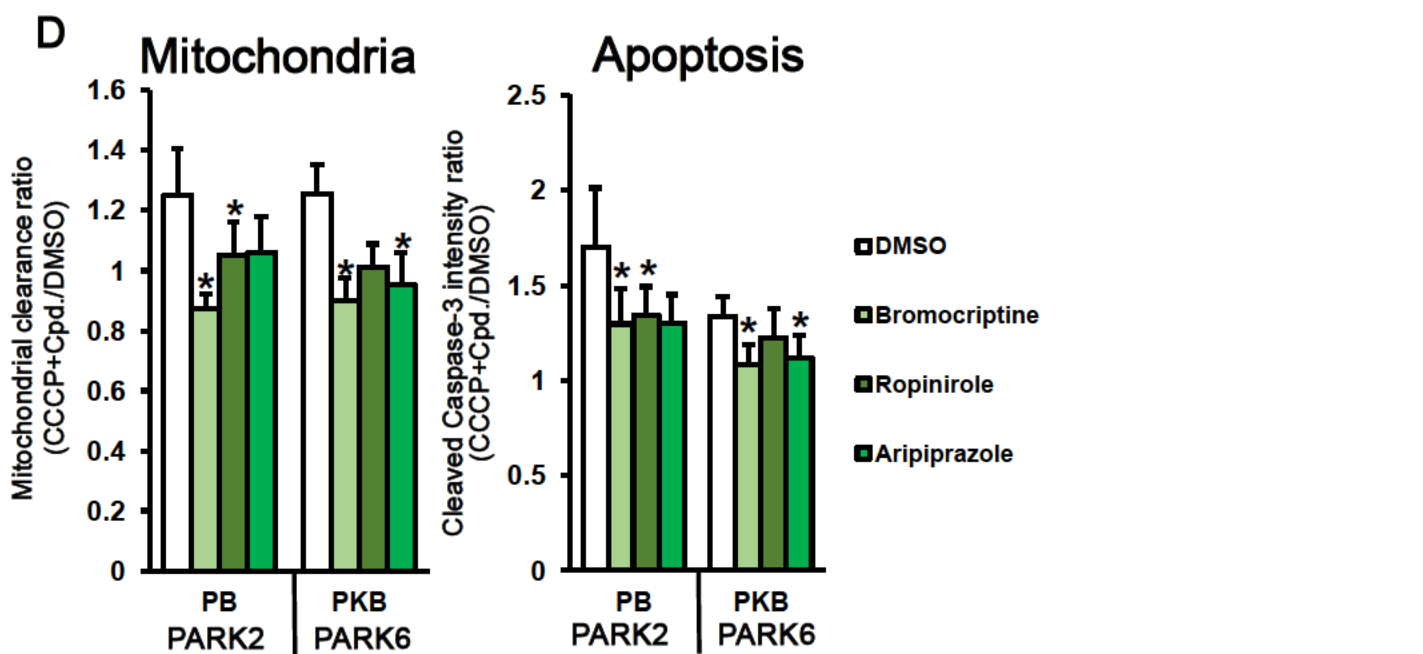

Figure S3

**Figure S3. Result of Each Compound in Screening and Validation of Calcium Channel Blockers and D<sub>2</sub> receptor Agonists. Related to Figure 2**

(A) Results of MRS1220 and tranylcypromine in compound library screening. (B) Results of flunarizine in compound library screening. (C) Results of mitochondrial clearance assay using various types of calcium channel blockers. Screening assays were similarly performed as Figure 2A. (D) Mitochondrial clearance and apoptosis assays with several D<sub>2</sub> receptor agonists. For the mitochondrial clearance assay, data represent the ratio of the mitochondrial area in neurons treated with CCCP and each compound and that in neurons treated with DMSO (n=9 independent replicates; mean  $\pm$  SEM). For the apoptosis assay, data represent the ratio of the fluorescence intensity of the cleaved caspase-3 treated with CCCP+compound and that treated with DMSO (n=9 independent replicates; mean  $\pm$  SEM). \*p<0.05 compared with CCCP+DMSO treatment using Wilcoxon signed-rank test. CCCP means carbonyl cyanide 3-chlorophenylhydrazone.

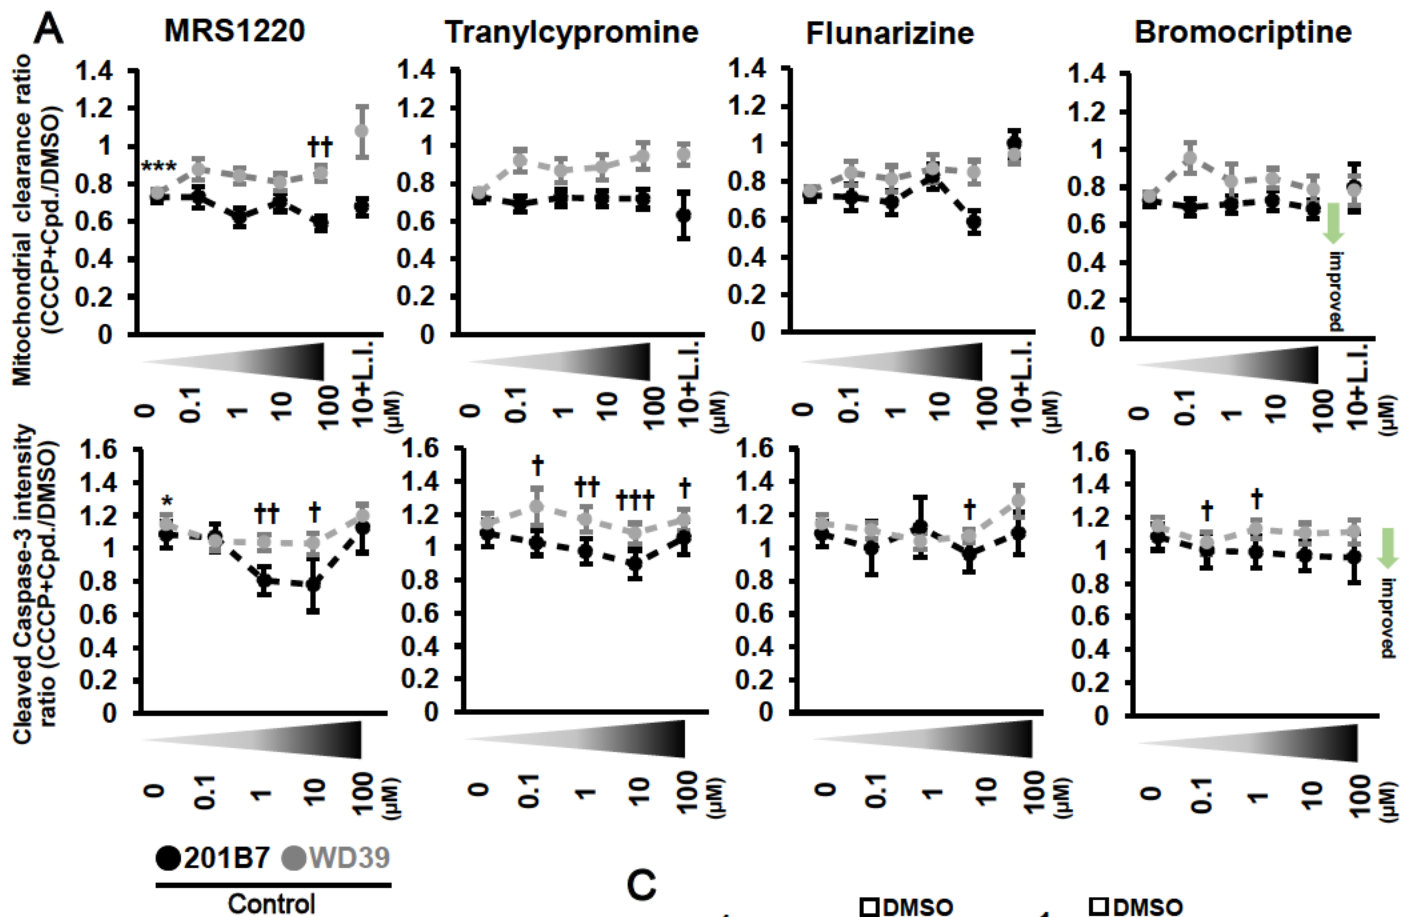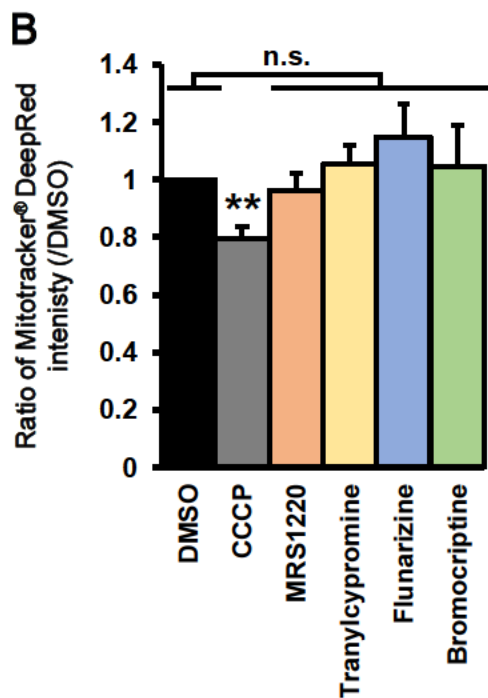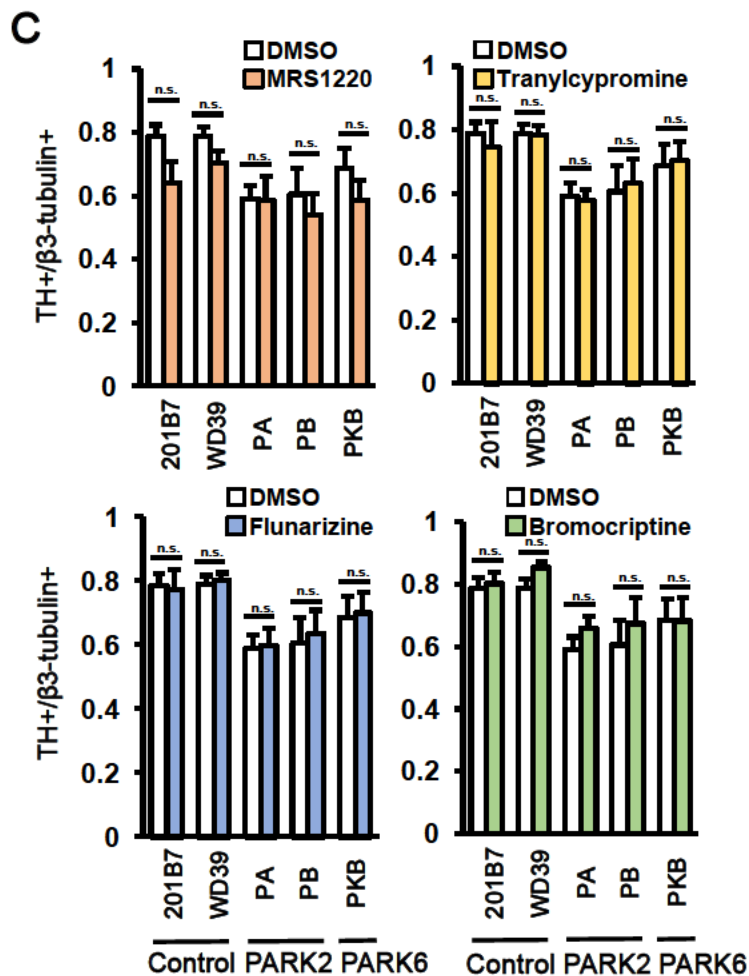

Figure S4



**Figure S4. Detailed Evaluation of Candidate Compounds. Related to Figure 3**

(A) Quantitative data of candidate compounds in mitochondrial clearance and apoptosis assays in two control (201B7 and WD39) neurons. Plots show the results of DMSO, 0.1-100  $\mu$ M of each candidate, and 100  $\mu$ M of each candidate with lysosomal inhibitors (L.I.) under CCCP treatment. Data represent the mean  $\pm$  SEM. (n=10 independent replicates). \* $p$ <0.05; \*\*\* $p$ <0.001 compared with DMSO, † $p$ <0.05; †† $p$ <0.01; ††† $p$ <0.001 compared with CCCP+DMSO by Wilcoxon signed-rank test. L.I., lysosomal inhibitors (E64d and pepstatin A). (B) Effect of candidates on mitochondrial membrane potential. Mitotracker<sup>®</sup> signal becomes weaker when mitochondrial membrane potential decreased. Data represent the ratio of fluorescence intensity of Mitotracker DeepRed<sup>®</sup> in neurons treated with DMSO and that in neurons treated with the compound (n=9 independent replicates; mean  $\pm$  SEM). \*\* $p$ <0.01 compared with DMSO by Wilcoxon signed-rank test. n.s. means not significant. (C) Effect of candidates on differentiation (TH-positive ratio). Data represent the mean  $\pm$  SEM. (n=9 independent replicates). n.s. means not significant by one-way ANOVA. CCCP means carbonyl cyanide 3-chlorophenylhydrazone.

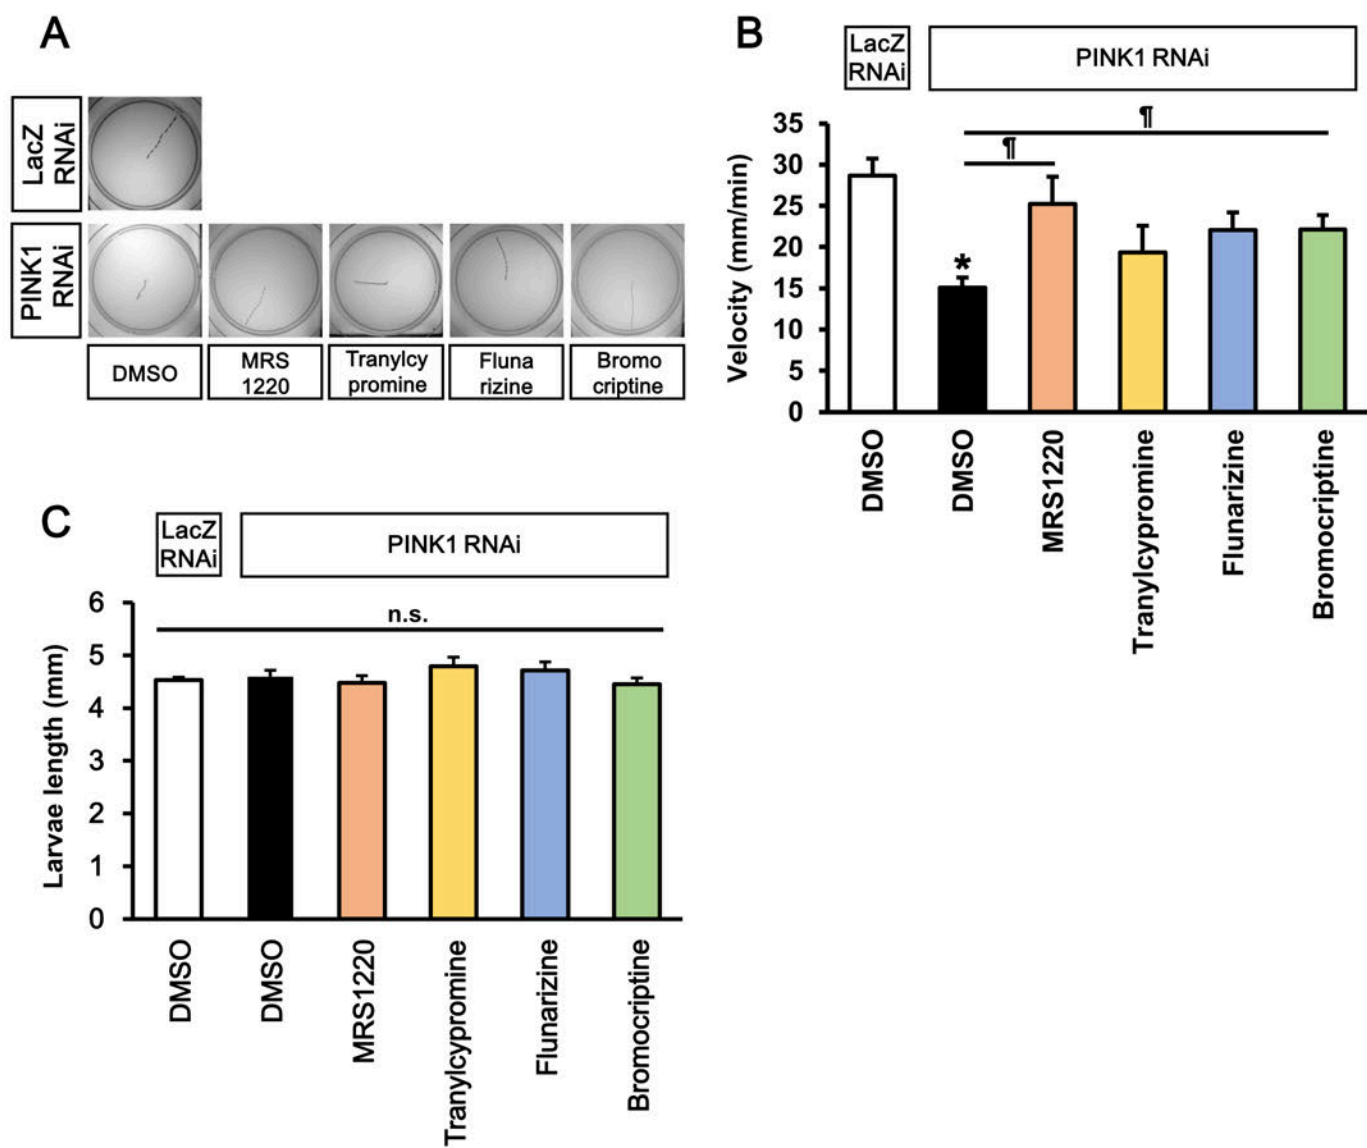

Figure S5

**Figure S5. Candidate evaluation in *PINK1*-inactivated *Drosophila*. Related to Figure 5**

(A) Tracking of representative larval movements treated with or without drugs. Larvae were placed at the center of dishes, and their movements recorded for 1 min. LacZ RNAi flies served as the healthy control. (B) Velocity of the movements measured in (A). Data represent the mean  $\pm$  SEM (n=7-22 independent replicates). \*p<0.05 compared with DMSO in LacZ RNAi, ¶p<0.05 compared with DMSO in PINK1 RNAi by Dunnett's test. (C) The body size of larvae with or without drugs. (n=7-24 independent replicates; mean  $\pm$  SEM). n.s. means not significant by one-way ANOVA.

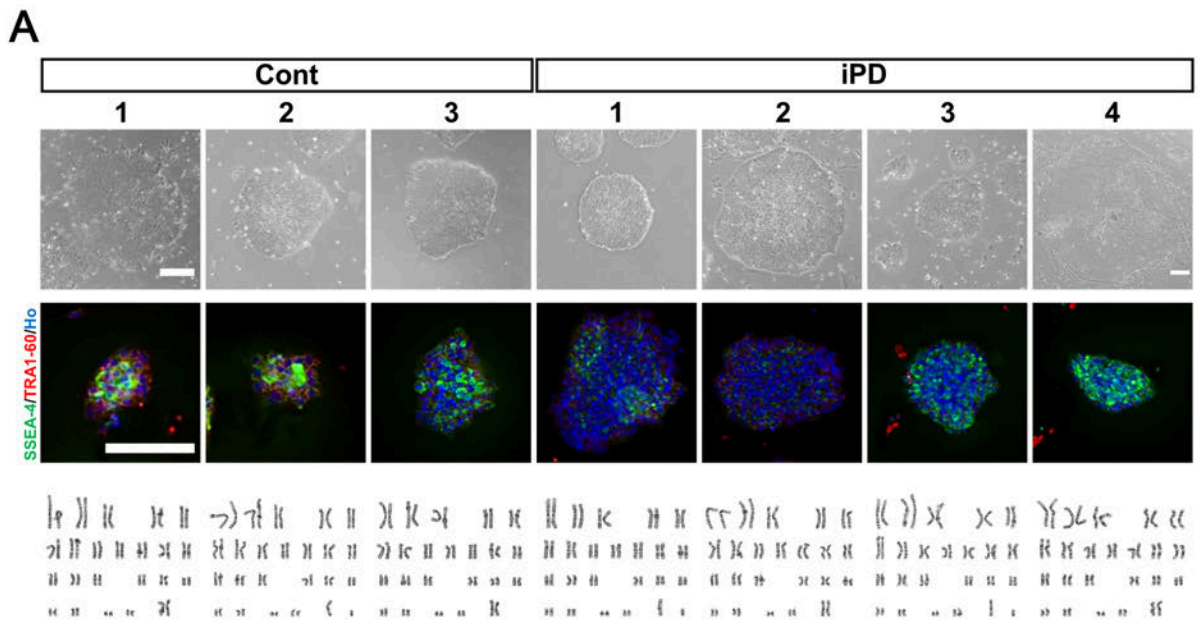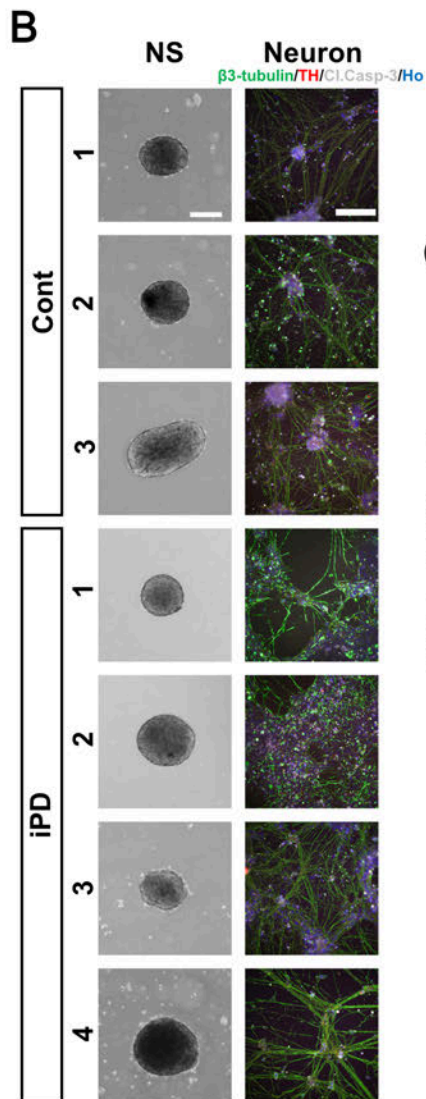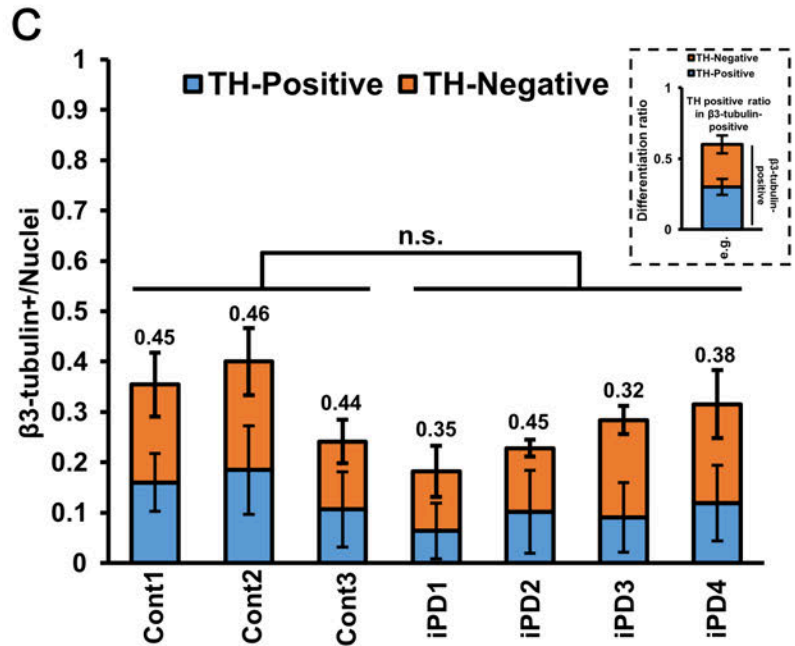

Figure S6

**Figure S6. Characterization of Newly Established iPSCs derived from Control and Patients with Sporadic PD. Related to Figure 6**

(A) Generation of iPSCs from patients with idiopathic PD and healthy controls. Representative images of iPSC colonies and their karyotypes are shown. Immunostaining of iPSCs was performed with multipotency markers (SSEA-4 and TRA-1-60) and Hoechst. Scale bar = 200  $\mu\text{m}$ . (B) Representative images of neurospheres (NS) and neurons. Immunostaining of iPSCs and neurons was performed with a neuronal marker ( $\beta$ 3-tubulin), a dopaminergic neuron marker (TH), and Hoechst. Scale bar = 200  $\mu\text{m}$ . (C) Quantitative analysis of  $\beta$ 3-tubulin positive ratio. The percentage above the bar indicates the TH-positive ratio in  $\beta$ 3-tubulin positive neurons (n=6-9 independent replicates; mean  $\pm$  SEM). n.s. means not significant by one-way ANOVA.

**Table S1. iPSCs derived from healthy donors and patients with familial PDs. Related to Figure 1.**

| Category       | Gender | Ethnicity | Cells of Origin   | Reprogramming Method | Sampling Age | Age of Onset | Risk Variants                       | H&Y Stage | Reference             |
|----------------|--------|-----------|-------------------|----------------------|--------------|--------------|-------------------------------------|-----------|-----------------------|
| Normal (201B7) | F      | Caucasian | Dermal fibroblast | Retro virus          | 36           | N/A          | N/A                                 | N/A       | Takahashi et al. 2007 |
| Normal (WD39)  | F      | Asian     | Dermal fibroblast | Retro virus          | 16           | N/A          | N/A                                 | N/A       | Imaizumi et al. 2012  |
| PARK2 (PA9)    | F      | Asian     | Dermal fibroblast | Retro virus          | 72           | 62           | <i>Parkin</i> Ex. 2-4 deletion homo | II        | Imaizumi et al. 2012  |
| PARK2 (PB20)   | M      | Asian     | Dermal fibroblast | Retro virus          | 50           | 28           | <i>Parkin</i> Ex. 6,7 deletion homo | N/A       | Imaizumi et al. 2012  |
| PARK6 (PKB4,6) | F      | Asian     | Dermal fibroblast | Retro virus          | 61           | 54           | <i>PINK1</i> c.1162T>C homo         | III       | Shiba et al. 2017     |

**Abbreviations: N/A, not available; H&Y Stage, Hoehn and Yahr stage.**

**Table S2. iPSCs derived from healthy donors and patients with idiopathic PDs. Related to Figure 6.**

| Category | Gender | Ethnicity | Cells of Origin | Reprogramming Method | Sampling Age | Age of Onset | Risk Variants                      | H&Y Stage |
|----------|--------|-----------|-----------------|----------------------|--------------|--------------|------------------------------------|-----------|
| Cont1    | F      | Asian     | PBC             | Sendai virus         | 84           | N/A          | N/A                                | N/A       |
| Cont2    | M      | Asian     | PBC             | Sendai virus         | 67           | N/A          | N/A                                | N/A       |
| Cont3    | F      | Asian     | PBC             | Sendai virus         | 47           | N/A          | N/A                                | N/A       |
| iPD1     | M      | Asian     | PBC             | Sendai virus         | 76           | 75           | <i>LRRK2</i><br>p.G2385R<br>hetero | III       |
| iPD2     | F      | Asian     | PBC             | Sendai virus         | 66           | 60           | N/A                                | I         |
| iPD3     | M      | Asian     | PBC             | Sendai virus         | 66           | 56           | <i>LRRK2</i><br>p.G2385R<br>hetero | II        |
| iPD4     | F      | Asian     | PBC             | Sendai virus         | 64           | 62           | N/A                                | II        |

**Abbreviations: PBC, peripheral blood cells; N/A, not available; H&Y Stage, Hoehn and Yahr stage.**

**Table S3. Antibodies used for staining. Related to Experimental Procedures.**

| Protein           | Species | Source (catalogue #)                | Dilution |
|-------------------|---------|-------------------------------------|----------|
| FOXA2             | Goat    | Santa Cruz Biotechnology (sc-6554)  | 1:500    |
| LMX1A             | Rabbit  | Sigma (HPA030088)                   | 1:300    |
| NURR1             | Mouse   | R&D (PP-N1404)                      | 1:300    |
| GIRK2             | Rabbit  | Alomone Labs (APC-006)              | 1:300    |
| $\beta$ 3-tubulin | Mouse   | Sigma (T8660)                       | 1:1000   |
| TH                | Mouse   | Sigma (T1299)                       | 1:1000   |
| TH                | Rabbit  | Millipore (AB152)                   | 1:1000   |
| Complex III-Core1 | Mouse   | Sigma (459140)                      | 1:300    |
| TOM20             | Rabbit  | Santa Cruz Biotechnology (sc-11415) | 1:300    |
| Cleaved Caspase-3 | Rabbit  | Cell Signaling Technology (9661)    | 1:400    |
| SSEA4             | Mouse   | Abcam (ab16287)                     | 1:1000   |
| TRA-1-60          | Mouse   | Millipore (MAB4360)                 | 1:1000   |



**Table S4. Compounds used for screening. Related to Experimental Procedures.**

| Compound                    | Molecular Weight | Source (catalogue #)                 | Concentration (reference)          |
|-----------------------------|------------------|--------------------------------------|------------------------------------|
| DMSO                        | 78.13            | Fujifilm-Wako (048-21985)            | 0.3%                               |
| CCCP                        | 204.62           | Sigma (C2759)                        | 30 $\mu$ M (Imaizumi et al. 2012.) |
| Bafilomycin A1              | 622.83           | Sigma (B1793)                        | 5 $\mu$ M (Imaizumi et al. 2012.)  |
| E-64-d                      | 342.43           | Peptide Institute (4321-v)           | 30 $\mu$ M (Hirano et al. 2019.)   |
| Pepstatin A                 | 685.89           | Peptide Institute (4397-v)           | 15 $\mu$ M (Hirano et al. 2019.)   |
| Rotenone                    | 394.42           | Sigma (R8875)                        | 10 $\mu$ M (Tabata et al. 2018.)   |
| MRS 1220                    | 403.83           | Santa Cruz Biotechnology (sc-361259) | 10 $\mu$ M                         |
| Tranlycypromine             | 169.65           | Sigma (P8511)                        | 10 $\mu$ M                         |
| Bromocriptine mesylate      | 750.70           | Fujifilm-Wako (020-18471)            | 10 $\mu$ M                         |
| Flunarizine dihydrochloride | 477.42           | Sigma (F8257)                        | 10 $\mu$ M                         |
| Ropinirole hydrochloride    | 296.84           | Sigma (R2530)                        | 10 $\mu$ M                         |
| Aripiprazole                | 448.39           | Sigma (SML0935)                      | 10 $\mu$ M                         |

## Supplemental Experimental Procedures

### Immunocytochemistry

iPSCs, NS, or mDA neurons were fixed with 4% paraformaldehyde (PFA) in PBS at 23 °C for 30 min. The fixed mDA neurons in 96-well plates were washed with PBS automatically by a plate washer (HydroSpeed plate washer; Tecan) in the following steps. The cells were blocked with 5% FBS and 0.3% Triton X-100 in PBS for 30 min and then stained with the primary antibodies at 4 °C overnight (Table S3). After rinsing with PBS, the cells were incubated with species-specific Alexa Fluor 488-, Alexa Fluor 555-, or Alexa Fluor 647-conjugated secondary antibodies (1:500; ThermoFisher) and Hoechst 33258 (1:5000; Sigma) at 23 °C for 1 h (iPSC and mDA neurons) or overnight (NS). For whole mount image acquisition of NS, the stained samples were treated with a clearing solution of 60% glycerol and 2.5 M fructose in distilled H<sub>2</sub>O (Dekkers et al., 2019) for 20 min. Then, the cleared samples were gently placed in microscope slides and mounted by the clearing solution. The images were obtained using a BZ-Z810 microscope (Keyence, Osaka, Japan) and IN Cell Analyzer 2200 imaging system (GE Healthcare, Chicago, IL, USA).

### High-content analysis

For the cell population, mitophagy, ROS, and apoptosis assays, the stained neurons were imaged on 96-well plates by the IN Cell Analyzer 2200 imaging system (GE Healthcare). Twenty-five fields were automatically collected from each well using a 20× magnification for the cell population, ROS, and apoptosis assays, whereas 50 fields were collected from each well using a 60× objective for the mitophagy assay. The images were analyzed by IN Cell Developer Toolbox v1.9 (GE Healthcare). The nuclei, neuronal cell bodies, dopaminergic neurons, and mitochondria were identified with Hoechst, β3-tubulin, TH, and Complex III-Core 1 staining, respectively. Apoptosis was detected by cleaved caspase-3 staining. To analyze the phenotypes in neurons, the stained area of Complex III-Core 1 (mitochondrial clearance assay), and the fluorescence intensities of CellROX® (ROS assay) and cleaved Caspase-3 (apoptosis assay) in the neural soma recognized by Hoechst and β3-tubulin and/or TH signals were analyzed. The quantified area/intensity was normalized using the number of β3-tubulin and/or TH-positive nuclei. For the cell population assay, by setting the areas of β3-tubulin- and TH-positive cells, the numbers of Hoechst-positive total nuclei, β3-tubulin-positive nuclei, and TH-positive nuclei were analyzed. For drug screening, the raw value in each plate ( $V_r$ ) was corrected ( $V_c$ ) to account for variations between plates using the following formula:

$$V_c = V_r \times \left( \frac{\text{\{the average value of CCCP treatment per DMSO in all plates\}}}{\text{\{the value of CCCP treatment per DMSO in the target plate\}}} \right)$$

The overview of the analysis is shown in Figure S2.

### Mitochondrial clearance assay

For induction of mitochondrial clearance, 30  $\mu\text{M}$  CCCP (Sigma), 10  $\mu\text{M}$  Rotenone (Sigma), or 0.3% DMSO were added in differentiation medium without dibutyryl-cAMP for 48 h. To assess the lysosomal degradation of mitochondria, 5  $\mu\text{M}$  BafA1 (Sigma), or 30  $\mu\text{M}$  E-64-d (Peptide Institute, Ibaraki, Japan) plus 15  $\mu\text{M}$  pepstatin A (Peptide Institute) were also added at the same time. Subsequently, the cells were fixed and stained as described in “Immunocytochemistry”, and automated analysis methods were discussed in “High-content analysis”. The total mitochondrial area was normalized using the total  $\beta$ 3-tubulin–positive nuclei number, and the mitochondrial clearance were evaluated using the ratio with DMSO treatment conditions.

#### **Oxidative stress assay**

After the CCCP treatment, the neurons were incubated with the CellROX<sup>®</sup> RGreen Reagent (Life Technologies) for 30 min at 37 °C following the manufacturer’s instructions. Afterwards, the cells were fixed with 4% PFA at 23 °C for 30 min and stained with antibodies as described above. The automated analysis methods were as discussed in “High-content analysis.” The total CellROX<sup>®</sup> intensity in neurons was normalized using the total  $\beta$ 3-tubulin–positive nuclei number and calculated using the ratio of the CCCP treatment and DMSO treatment.

#### **Mitochondrial membrane potential assay**

After treatment with the compound for 2.5 h, the neurons were incubated with the Mitotracker<sup>®</sup> DeepRed FM (Life Technologies), a mitochondrial membrane potential indicator (Nakahira et al., 2011), at 37 °C for 30 min according to the manufacturer’s instructions. Subsequently, the cells were fixed and stained. Image acquisition and quantification were performed by the IN Cell Analyzer 2200 imaging system and IN Cell Developer Toolbox v1.9, respectively (GE Healthcare).

#### **Crawling assay of *Drosophila* larvae**

The wandering larvae fed with or without compounds were placed in the middle of a 2% agar plate (100 mm in diameter). The body size of larvae in each group was not significantly different (Figure S5C). Larval positions were recorded every 7.5 s using a webcam (BSW20KM11BK; Buffalo, Nagoya, Japan) and traced by ImageJ software. The moving distance for 1 min was calculated using the ImageJ software.

#### **Analysis of mitochondrial morphology of *Drosophila* larvae**

Z-stacked images (5- $\mu\text{m}$  thick) of mito-GFP–positive perinuclear mitochondria (40- $\mu\text{m}^2$ -square containing a nucleus in the center) in the third-instar larval body wall muscle cells were obtained by confocal microscopy (Leica SP5). More than 2- $\mu\text{m}^2$ -aggregated mitochondria were extracted by the ‘Analyze particles’ tool of the ImageJ software.

### **ATP assay**

The effect of the compounds on ATP production was analyzed using CellTiter-Glo<sup>®</sup> Luminescent Cell Viability Assay (Promega, Madison, WI, USA). After treatment with compounds, 100  $\mu$ L CellTiter-Glo<sup>®</sup> Reagent was added to the cells or *Drosophila* larval homogenates in white 96-well plates, and the samples were incubated according to the manufacturer's instructions. For the ATP measurement in *Drosophila* larvae, the effects of bacterial flora in the gut were estimated with and without the digestive organs. Because the effects of bacterial flora were negligible, whole bodies were homogenized in 40  $\mu$ L of homogenization buffer (6 M guanidine-HCl, 100 mM Tris, and 4 mM EDTA; pH 7.8) and centrifuged at 16,000 g. The supernatants were diluted 1:500 and 1:10 with water and subjected to measurements of ATP and protein concentrations, respectively. ATP levels were estimated as luminescence intensity measured by a microplate reader (Mithras<sup>2</sup> LB943; Berthold, Bad Wildbad, Germany). The luminescence intensities were standardized with the amounts of proteins measured using the Pierce BCA Protein Assay Kit (Thermo Scientific).

### **Isolation of human T cells and small-scale induction into iPSCs**

The peripheral blood mononuclear cells (PBMCs) were obtained from 4 patients with idiopathic PD and 3 age-matched healthy donors. (Detailed information is listed in Table S2.) After centrifugation, CD3- and CD28-positive cells were selected and expanded using Dynabeads<sup>®</sup> Human T-Activator CD3/CD28 (ThermoFisher Scientific, Waltham, MA, USA) in KBM 502 medium (Kohjin Bio, Sakado, Japan) for 5–7 days. For cryopreservation, we used CELLBANKER<sup>®</sup>2 (ZENOAQ, Koriyama, Japan), and thawing was performed according to the manufacturer's instructions. After thawing, the activated T cells were transferred to a 24-well plate with 500- $\mu$ L KBM 502 medium at a density of  $8 \times 10^4$  cells/well, and then, Cytotune<sup>®</sup>-iPS 2.0 Reprogramming Kit (MOI=5; DNAVEC, Tsukuba, Japan), 0.25  $\mu$ M sodium butyrate (Sigma, St. Louis, MO, USA), and 5  $\mu$ M cyclic pifithrin (Sigma) were added. At 24 h post-infection, 500  $\mu$ L of the medium (KBM 502 + Sodium Butyrate, cyclic Pifithrin) was added. Defining the day on which the SeV infection was performed as day 0, the cells were collected on day 3 and transferred to a new 24-well plate coated with iMatrix 511-E8 (at a density of 0.5  $\mu$ g/cm<sup>2</sup>; Nippi, Adachi-ku, Japan). On day 4, 1 mL of hiPSC medium (StemFit<sup>®</sup> AK02N; Ajinomoto, Chuo-ku, Japan) was added. After day 6, hiPSC medium was changed every other day until the colonies were visible. On day 10 until day 21, the cell-generated iPSC colonies were passaged to 6-well plates coated with iMatrix 511-E8 for subsequent maintenance and cryopreservation. We used cells at passage 5–10 for differentiation. G-band karyotyping of the established iPSCs were performed at LSI Medience Corporation (Japan).

### **Genetic analysis**

PD-causative gene analysis was performed as previously reported (Shin et al., 2017). Briefly, PD- and dementia-associated genes, including *SNCA*, *Parkin*, *UCHL1*, *PINK1*, *DJ-1*, *LRK2*, *ATP13A2*, *GIGYF2*,

*HTRA2, PLA2G6, FBXO7, VPS35, EIF4G1, DNAJC6, SYNJI, DNAJC13, CHCHD2, GCHI, NR3A2, VPS13C, RAB7L1, BST1, c19orf12, RAB39B, MAPT, PSEN1, GRN, APP, and APOE*, were screened using high-throughput, next-generation sequencing such as Ion Torrent System (IAD103177\_182; Thermo Fisher Scientific, Waltham, MA, US). The panel for sequencing was designed by Ion AmpliSeq Designer (<https://www.ampliseq.com>). Library preparation was performed by using an Ion AmpliSeq Kit for Chef DL8 (Thermo Fisher Scientific) and Ion Chef System (Thermo Fisher Scientific). Emulsion PCR was performed using an Ion 530 Kit-Chef, and the product was sequenced on an IonS5 Plus Sequencer with an Ion 530 Chip. Sequence alignment was performed using the Torrent Mapping Alignment Program aligner implemented in the Torrent Suite software (v5.10; Thermo Fisher Scientific).

### **Supplemental References**

Dekkers, J.F., Alieva, M., Wellens, L.M., Ariese, H.C.R., Jamieson, P.R., Vonk, A.M., Amatngalim, G.D., Hu, H., Oost, K.C., Snippert, H.J.G., et al. (2019). High-resolution 3D imaging of fixed and cleared organoids. *Nat. Protoc.* *14*, 1756–1771.

Nakahira, K., Haspel, J.A., Rathinam, V.A.K., Lee, S.J., Dolinay, T., Lam, H.C., Englert, J.A., Rabinovitch, M., Cernadas, M., Kim, H.P., et al. (2011). Autophagy proteins regulate innate immune responses by inhibiting the release of mitochondrial DNA mediated by the NALP3 inflammasome. *Nat. Immunol.* *12*, 222–230.

Shin, S., Kim, Y., Oh, S.C., Yu, N., Lee, S.T., Choi, J.R., and Lee, K.A. (2017). Validation and optimization of the Ion Torrent S5 XL sequencer and OncoPrint workflow for BRCA1 and BRCA2 genetic testing. *Oncotarget* *8*, 34858–34866.
